# Supplementary material
Source: HighWire-hosted journal article supplement (https://molpharm.aspetjournals.org/highwire/filestream/87403/field_highwire_adjunct_files/1/473_supp_fig_2.pdf)
Supplement: 473_supp_fig_2.pdf [file 473_supp_fig_2.pdf]

**Influence of the TARP  $\gamma 8$ -selective negative allosteric modulator JNJ-55511118 on AMPA receptor gating and channel conductance**

**Ian D. Coombs, Craig A. Sexton, Stuart G. Cull-Candy, Mark Farrant**

Molecular Pharmacology MOLPHARM-AR-2021-000473

**Fig S2.** JNJ-118 effects on deactivation and rectification of GluA2(Q)/ $\gamma 2$  and GluA2(Q)/ $\gamma 2$ .DM.

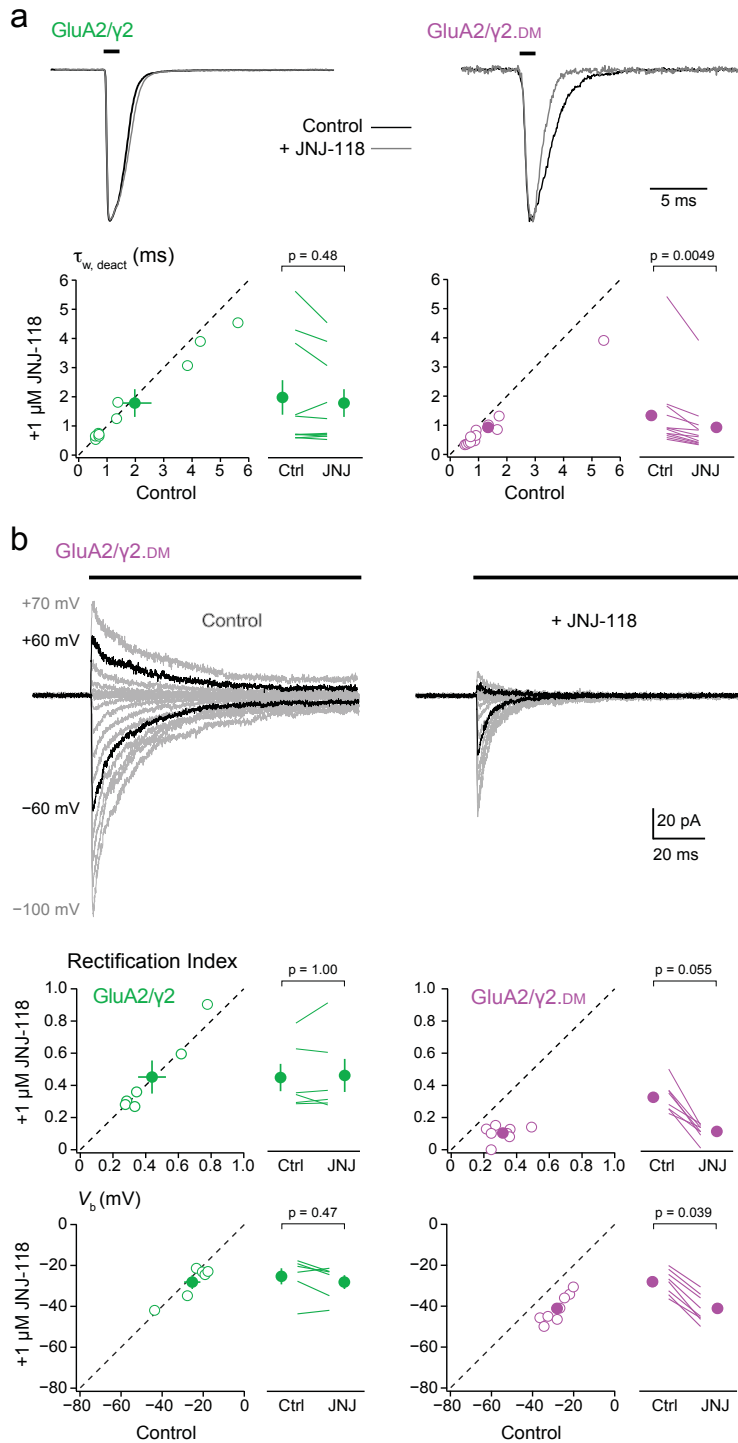

**Figure S2. JNJ-118 effects on deactivation and rectification of GluA2(Q)/γ2 and GluA2(Q)/γ2.DM**

a) Representative outside-out patch responses (10 mM glutamate, 1 ms) (black bars) recorded at  $-60$  mV from HEK293 cells transfected with GluA2/γ2 (left) or GluA2/γ2.DM (right) in control conditions (black) or in the presence of  $1 \mu$ M JNJ-118 (grey). Lower panels are scatter and paired plots showing the effects of JNJ-118 on the weighted mean time constant of deactivation ( $\tau_{w, deact}$ ). Indicated p-values (adjusted for multiple comparisons as described in **Table 1**) are from two-sided Wilcoxon signed rank exact tests following a non-parametric

omnibus test (**Table S1**). **b**) Representative responses evoked by 10 mM glutamate (200 ms; black bars) (as in **Fig 2**) showing the effects of 1  $\mu$ M JNJ-118 on Rectification Index and  $V_b$  (from individual double Boltzmann fitted conductance-voltage relationships) for GluA2/ $\gamma$ 2 and GluA2/ $\gamma$ 2.DM. Indicated p-values (adjusted as described in **Table 1**) are from two-sided Wilcoxon signed rank exact tests following a non-parametric omnibus test (**Table S1**).
